# Supplementary material for: Archaean oxygen oases driven by pulses of enhanced phosphorus recycling in the ocean
Source: Springer Nature journal article supplement (doi:10.1038/s41561-025-01678-4), 2025-04-16
Supplement: MOESM1 [file 41561_2025_1678_MOESM1_ESM.pdf]

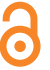

---

# Archaean oxygen oases driven by pulses of enhanced phosphorus recycling in the ocean

---

In the format provided by the authors and unedited

1 **This PDF file includes:**

2 Supplementary Information

3 Geological context

4 Methods

5 Data quality checks

6 Supplementary Figure 4

7 References

## 8 Supplementary Information

### 9 Geological context

10 The Red Lake carbonate platform was deposited in an open marine environment and lies in the  
11 Red Lake Greenstone Belt (RLGB) of the Uchi Subprovince in western Superior Craton (Supplementary  
12 Figure 1a). Supracrustal rocks of the Uchi Subprovince include Mesoarchean tholeiitic-komatiitic  
13 oceanic platform sequences, to Neoproterozoic basaltic-andesitic-rhyolitic calc-alkalic and tholeiitic  
14 volcanic arc sequences, both with chemical and siliciclastic sedimentary rocks<sup>1</sup>. The 300 m-thick  
15 carbonate succession outcropping along the western shore of RLGB consists, from oldest to youngest,  
16 of the Balmer, Ball, Slate Bay, Bruce Channel and Confederation Assemblages<sup>2</sup>. The carbonate overlies  
17 a thick series of Ball Assemblage ultramafic and mafic volcanic flows capped by approximately 100 m  
18 of sandstone. The sandstone is transitional upwards into stromatolitic dolostone<sup>3</sup>. The age of the  
19 platform is well constrained by U-Pb zircon dating of rhyolitic lapilli tuff below the carbonates, and a  
20 rhyolitic flow above, which places deposition between  $2940 \pm 2$  Ma to  $2925 \pm 3$  Ma<sup>4</sup>.

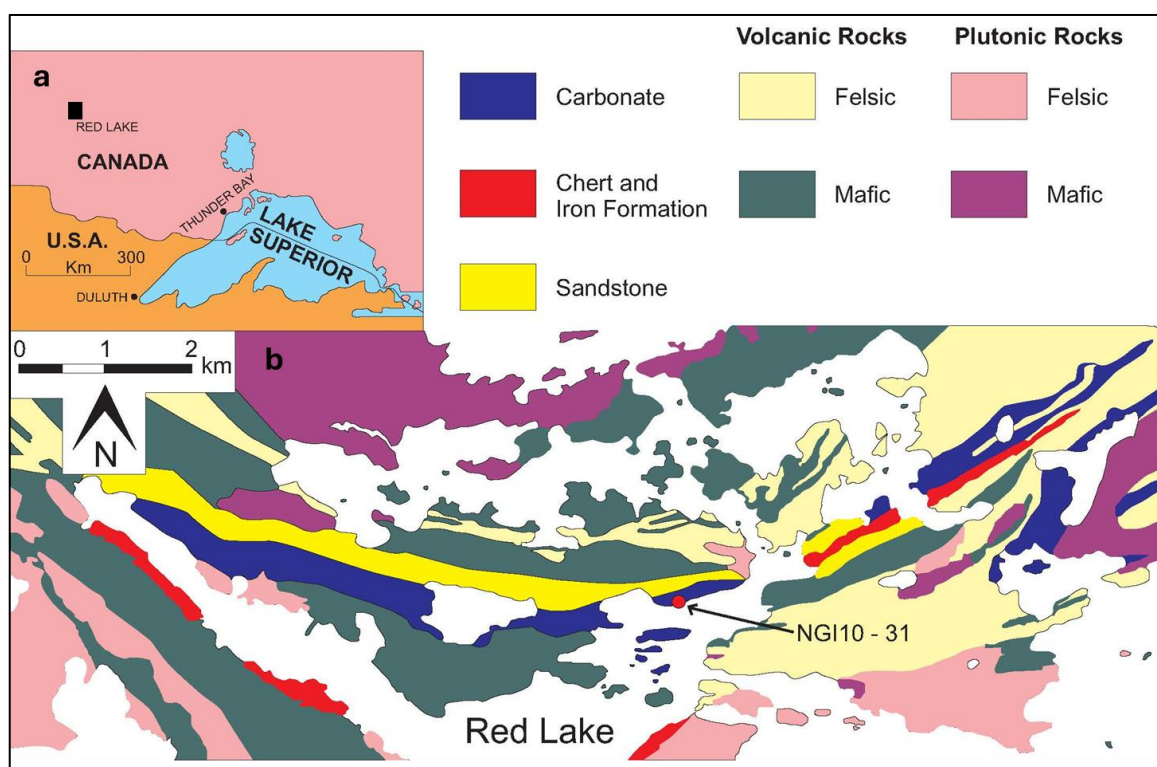

21 **Supplementary Figure 1 NGI10-31 drill core location. a)** Location of the Red Lake Area  
22 indicated by the black square. **b)** Geological map of the Red Lake carbonate platform indicating  
23 the location of the drill core NGI10-31.

24 The western outcrop area of the carbonate succession consists of supratidal coliform crusts in  
25 wavy laminated dolostone, and intertidal to very shallow subtidal deposits of stromatolites, layers of  
26 small crystal fan fabric, and thin layers of clastic carbonate storm deposits<sup>3</sup>. In deeper water to the  
27 east, m-scale limestone mounds composed entirely of large crystal fans are common, as are slides of  
28 limestone blocks in iron formation and cm-scale calcite layers intercalated with mm-scale magnetite  
29 laminae, representing the edge of the carbonate platform<sup>3,5</sup>. Periods of siliciclastic delivery to the  
30 nearshore are represented by layers of sandstone, siltstone and carbonaceous slate ± pyrite. A major  
31 flooding event, at approximately 100 m above the base of the carbonate, is denoted by the offshore  
32 iron formation, chert and fine-grained siliciclastics transgressing across the carbonate platform<sup>5</sup>. The  
33 platform experienced greenschist facies metamorphism and bears no visible or microscopic evidence  
34 for secondary or hydrothermal alteration<sup>5</sup>.

35 The NGI10-31 fully cored drill-hole studied here penetrated 75 m of dominantly dolomite  
36 underlying the studied interval, with approximately 80 m of the transgressive assemblage consisting  
37 of iron formation and siltstone, with minor carbonaceous slate ± sulphide layers. This transition from  
38 deposition of carbonate platform sediment to accumulation of offshore lithofacies was probably  
39 controlled by the development of transgressive systems track to highstand conditions<sup>6,7</sup>. The iron  
40 formation thins, becomes richer in chert and interfingers with dolostone sequences over six km to  
41 the west<sup>6</sup> (Supplementary Figure 1b), possibly representing more pronounced parasequence  
42 development closer to the shoreline. In this work, we focused on the transgressive sequence formed  
43 primarily by oxide iron formation, sulphidic slate, siltstone, and ferruginous chert.

44 The siliciclastics comprise siltstones and carbonaceous slates that probably represent enhanced  
45 incursions of detrital material into the basin. In the Red Lake area, fluvial feeder systems were subject  
46 to allocyclic conditions that caused the periodic relocation of their entry point into the marine realm,  
47 which commonly occurs through the avulsion of a channel system upstream from its mouth. This  
48 would account for periodic changes in the delivery of siliciclastics to this area of the platform, and  
49 reflects a temporal rather than spatial control, although the increased influx of siliciclastics may have  
50 caused shallowing<sup>5</sup>.

51 The oxide iron formation primarily comprises magnetite interlaminated with chert. Magnetite  
52 layering is straight to slightly wavy, parallel, laterally continuous, and commonly has sharp contacts  
53 with the chert bands<sup>5</sup>. Similar to the nearby Steep Rock Lake iron deposits<sup>8,9</sup>, the deposition of oxide  
54 iron formation facies resulted from an offshore, ferrous (Fe<sup>2+</sup>) iron-rich water mass reacting with a  
55 slightly oxygenated water mass close to the redox boundary separating the carbonate shallow shelf

56 from the further offshore lithofacies<sup>3,5</sup>. This resulted in the accumulation of ferric oxyhydroxides or  
57 hydroxides on the bottom, which were eventually transformed into magnetite during diagenesis. The  
58 sulphidic slate has a variable thickness (0.5 m to 5 m) and contains either pyrite or pyrrhotite, or a  
59 combination of both, and is commonly associated with carbonaceous black slate and interbedded  
60 with siltstones and oxide iron formation. The highly reducing environment would have hindered the  
61 formation of iron oxides, favouring instead the formation of iron sulphides in conjunction with  
62 organic-rich slates. Lastly, successions of white to grey, massive chert of up to 10 m thickness are also  
63 present in the NGI10-31 core, which formed through rapid precipitation from low-temperature silica-  
64 rich hydrothermal fluids<sup>5</sup>.

65 The alternation between siltstones and the other lithofacies requires that their sedimentation was  
66 episodic, and when deposited accumulation rates were much higher than that of the organic-rich  
67 mud. Thus, the siltstone layers would represent discrete depositional events of sediment derived  
68 from erosion of the landmass washed onto the shallow shelf and extending into the further offshore  
69 areas<sup>5,9</sup>. The offshore iron formations, chert and carbonaceous slate were likely deposited in about  
70 200 m of water or less, as there is no extensive development of slump deposits and their  
71 transgressions onto the carbonate-dominated portion of the platform indicate they were forming at  
72 approximately that depth<sup>5</sup>.

## 73 **Methods**

### 74 ***a) Sampling strategy***

75 Core NGI10-31 is located at Thunder Bay University (Canada) and was collected from the Red Lake  
76 area, Canada, with coordinates of Easting 416319 and Northing 5653970. The core has a depth of  
77 142 m, and a total of 34 samples were collected between 60 and 140 m depth, of which 30 were used  
78 for geochemical analyses. The sampling strategy was designed to ensure the collection of  
79 representative samples of all the lithologies present: iron oxide formation, sulphidic slate, ferruginous  
80 chert, siltstone and dolostone. Samples were collected approximately every 2.5 m. Portions of the 30  
81 selected samples with no veining or weathering alteration were crushed to a very fine powder using  
82 an agate mortar.

### 83 ***b) Iron speciation***

84 Iron speciation analysis was conducted via the well-established sequential extraction procedure<sup>10</sup>  
85 at the Géosciences Environnement Toulouse Laboratory (GET), France. Acid-volatile sulphides (AVS)  
86 and pyrite Fe (Fe<sub>p<sub>y</sub></sub>) were quantified gravimetrically via a two-step chromium (II) chloride distillation<sup>11</sup>,

87 followed by the precipitation of pyrite sulphur as  $\text{Ag}_2\text{S}$ , in the Cohen Geochemistry Lab at the  
88 University of Leeds, UK. The sequential extraction protocol takes  $\sim 0.1$  g of powdered sedimentary  
89 rock and targets different operationally-defined proportions of iron through three sequential  
90 extraction steps: (1) sodium acetate to target iron carbonates ( $\text{Fe}_{\text{Carb}}$ ), (2) sodium dithionite for Fe(III)  
91 oxides such as goethite and hematite ( $\text{Fe}_{\text{Ox}}$ ), and (3) ammonium oxalate for magnetite ( $\text{Fe}_{\text{Mag}}$ ).  
92 Together, these phases define an Fe pool, which is considered 'highly reactive' ( $\text{Fe}_{\text{HR}}$ ) during  
93 sedimentation and diagenesis<sup>12</sup>, determined as the sum of  $\text{Fe}_{\text{Carb}} + \text{Fe}_{\text{Ox}} + \text{Fe}_{\text{Mag}} + \text{Fe}_{\text{Py}}$ . Iron  
94 concentrations ( $\text{Fe}_{\text{Carb}}$ ,  $\text{Fe}_{\text{Ox}}$  and  $\text{Fe}_{\text{Mag}}$ ) were determined via atomic absorption spectroscopy (ASS) on  
95 a Perkin Elmer AAnalyst 400. Replicate analyses of a sample ( $n = 4$ ) yielded a relative standard  
96 deviation (RSD) of 0.4%, 4.3%, 8.3% and 3.1% for  $\text{Fe}_{\text{Carb}}$ ,  $\text{Fe}_{\text{Ox}}$ ,  $\text{Fe}_{\text{Mag}}$  and  $\text{Fe}_{\text{Py}}$ , respectively.  
97 Geochemical data are reported in Supplementary Table 1.

### 98 **c) Phosphorus phase partitioning**

99 We performed the sequential P extraction scheme<sup>13</sup> adapted for ancient sedimentary rocks<sup>14</sup> at  
100 the Géosciences Environnement Toulouse Laboratory (GET), France, on sediment aliquots of  $\sim 100$ –  
101 190 mg. The method targets five operationally-defined sedimentary P pools including iron-bound  
102 phosphorus ( $\text{P}_{\text{Fe}}$ ), authigenic P ( $\text{P}_{\text{aut}}$ ), organic-bound P ( $\text{P}_{\text{org}}$ ) and crystalline apatite P (dominantly  
103 detrital P;  $\text{P}_{\text{det}}$ ). For each extraction step, except for  $\text{P}_{\text{Fe}}$ , P concentrations were determined  
104 spectrophotometrically using the molybdate-blue method<sup>15</sup> on a UVisco spectrophotometer at 880  
105 nm.  $\text{P}_{\text{Fe}}$  was measured by inductively coupled plasma–optical emission spectrometry (Horiba Jobin  
106 Yvon Expert ICP-OES) due to interference between the extraction chemicals and the molybdate-blue  
107 method. We obtained an average recovery of 89% of total P (as determined by bulk extraction; see  
108 below), and replicate analyses of a sample ( $n = 4$ ) gave a relative standard deviation (RSD) of  $<10\%$   
109 for each step. Geochemical data are reported in Supplementary Table 1.

### 110 **d) ICP-MS**

111 Bulk sediment digestions were performed at the Center for Astrobiology (CAB), CSIC-INTA, Spain,  
112 and at the British Geological Survey (BGS), on  $\sim 50$  mg of rock powder using  $\text{HNO}_3/\text{HF}/\text{HClO}_4/\text{H}_2\text{O}_2$ .  
113 Whole-rock elemental concentrations (major, minor and trace elements) were measured by  
114 inductively coupled plasma–mass spectrometry (ICP-MS) on a PerkinElmer Nexion2000C ICP-MS  
115 spectrometer. The calibration and optimization of the instrument were performed using a calibration  
116 standard solution containing 1 ppb Be, Ce, Fe, In, Li, Mg, Pb and U to obtain the maximum intensity,  
117 as well as oxide/double charge ion lower than 0.03%. Quantitative ICP-MS analysis was performed

118 using external calibration and internal standardization. The internal standard, which was In, was  
119 added to the blank, standards reference materials and komatiite sample solutions. Multi-element  
120 standard solutions were used for the external calibration. They consisted of a mixture of diluted  
121 solutions prepared from initial mono-element solutions of  $1000 \text{ mgL}^{-1}$  containing the analytes. The  
122 precision, accuracy and memory effects of the analysis were verified by evaluating the recoveries of  
123 all the analytes in the quality control multi-element standard solutions. Recovery percentages ranged  
124 between 90 and 110% and therefore validated the accuracy and reproducibility of our analysis.

#### 125 ***e) Total organic carbon***

126 Total organic carbon analyses through the Rock-Eval pyrolysis technique<sup>16</sup> were performed at the  
127 British Geological Survey (BGS, United Kingdom). Aliquots (~2 g) of crushed sample were weighed  
128 into a crucible and analysed in a bulk-flow pyrolysis-flame ionization detector (FID) Rock-Eval  
129 6 pyroanalyser. The instrument was initially calibrated with a standard sample and progressively  
130 heated to 600°C in a helium atmosphere. For 3 min, the oven was kept isothermally at 300°C and the  
131 free hydrocarbons were volatilized and measured as the S1 peak. The temperature was then  
132 increased from 300 to 600°C (at 25°C/min) and hydrocarbons and compounds containing oxygen  
133 ( $\text{CO}_2$ ) were produced during the thermal cracking of the insoluble organic matter (kerogen) in the  
134 rock (S2 and S3 peaks, respectively), and the residual organic carbon after pyrolysis (S4 peak). The  
135 total run time for each sample was approximately 20 min.

136 TOC was calculated by summing the pyrolyzable carbon (PC) and residual carbon (RC). The PC  
137 (generated during the pyrolysis stage) is calculated from the pyrolysis stage-derived S1, S2 and S3  
138 components, while the RC is derived from the oxidation phase by summing the CO (S4CO peak) and  
139  $\text{CO}_2$  (S4 $\text{CO}_2$  peak) generated due to oxidation of organic matter<sup>16</sup>. The precision of the Rock-Eval  
140 instrument for TOC was  $\pm 0.1\%$ .

#### 141 ***f) Raman spectroscopy***

142 Single Raman spectra of organic matter were obtained in the Geological Spectroscopy Laboratory  
143 at UCL with a WITec Confocal Raman Imaging system using a 532 nm laser at up to 1000x  
144 magnification. Carbonaceous targets were detected in standard petrological thin sections (30  $\mu\text{m}$  in  
145 thickness) using an optical microscope (Olympus BX51) equipped with 4x, 10x, 20x, 50x and 100x  
146 objectives. Cosmic ray reduction was applied to all spectra and their backgrounds fitted to a  
147 polynomial function and subtracted. Spectra decomposition and peak calculations were calculated by  
148 deconvoluting the spectra range from 1090 to 1700  $\text{cm}^{-1}$  using a Lorentzian function. After  
149 deconvolution, the main key Raman spectral parameters are the peak centre position of five-band

150 peaks: G-band ( $\sim 1594\text{ cm}^{-1}$ ), D1-band ( $\sim 1350\text{ cm}^{-1}$ ), D2-band ( $\sim 1620\text{ cm}^{-1}$ ), D3-band ( $\sim 1510\text{ cm}^{-1}$ ),  
151 and D4-band ( $\sim 1245\text{ cm}^{-1}$ ), area, width, and full width at half maximum (FWHM).

152 To evaluate maximum metamorphic temperatures of organic matter from the Raman spectra we  
153 used the geothermometer of reference 17, based on the FWHM values of D1- and D2-bands (FWHM-  
154 D1 and FWHM-D2), which show almost linear relations ( $R^2=0.97$  and  $R^2=0.968$ ) with temperature in  
155 the range of approximately  $150\text{--}400^\circ\text{C}^{17}$ . Therefore, these parameters can be used to estimate the  
156 metamorphic temperature for low-medium grade rocks with two different equations:  $T(^{\circ}\text{C}) = -2.15$   
157  $(\text{FWHM-D1}) + 478$  and  $T(^{\circ}\text{C}) = -6.78 (\text{FWHM-D2}) + 535$ .

## 158 **Data quality checks**

### 159 ***a) Metamorphism***

160 Special caution must be taken when working with ancient sedimentary rocks that have  
161 undergone recrystallization and metamorphism. This is because estimations of the reactive P pool  
162 may be compromised due to the potential recrystallisation of  $P_{\text{auth}}$  into well-crystalline apatite,  
163 generally extracted as  $P_{\text{det}}^{18}$ . The majority of the Red Lake Greenstone Belt has experienced  
164 greenschist to lower amphibolite facies metamorphism<sup>4</sup>. Therefore, it is essential to determine the  
165 approximate maximum metamorphic temperatures reached by organic matter locally, in the NGI10-  
166 31 core, to evaluate the extent of metamorphic alteration on the samples. In this study, we employed  
167 Raman spectroscopy to obtain single-spectrum data from various samples and compared the result  
168 with the geothermometer approach described by ref [17]. The results indicate variable temperatures  
169 ranging from  $340^\circ\text{C}$  to  $380^\circ\text{C}$  (Supplementary Figure 2), placing the core samples within the  
170 greenschist metamorphic range.



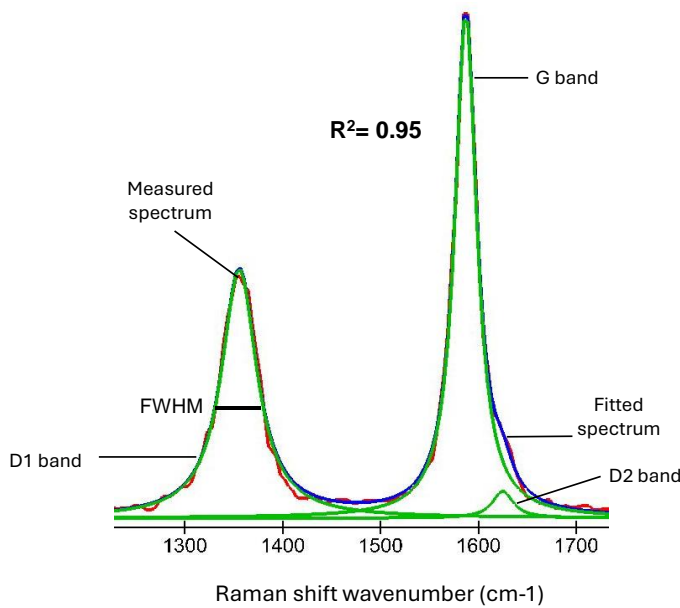

| NGI 11  | Raman parameters |      |       |
|---------|------------------|------|-------|
|         | Position         | FWHM | Area  |
| G band  | 1587             | 26   | 897   |
| D1 band | 1355             | 43   | 721   |
| D2 band | 1625             | 25   | 44.83 |

| T1 (°C) | T2 (°C) |
|---------|---------|
| 386     | 366     |
| Average | 376     |

171 **Supplementary Figure 2 Lorentzian peak-fitting of the Raman spectrum and peak**  
 172 **metamorphic temperature calculation for the sample NGI 11.** The two first-order Raman  
 173 bands of organic matter at  $\sim 1350\text{ cm}^{-1}$  and  $\sim 1600\text{ cm}^{-1}$  are represented. Peak decomposition  
 174 in bands (G, D1, D2) and the full width at half maximum (FWHM) are shown. The coefficient  
 175 of determination ( $R^2$ ) compares the original spectrum (red) with the fitted Raman spectrum  
 176 (blue). Temperatures are calculated with the geothermometer of reference 17.

### 177 ***b) P phase partitioning***

178 A comparison of total P contents from the bulk digestion with the sum of P from the sequential  
 179 extraction shows a positive correlation ( $R^2=0.49$ ; Supplementary Figure 3a) and a slope of  $\sim 0.95$ ,  
 180 suggesting that individual P extractions successfully recovered the bulk P content<sup>14</sup>. Note that  
 181 samples NGI 26 and NGI 29, by contrast, indicate very poor recovery, and we chose to discard these  
 182 samples to avoid misinterpretation. To evaluate whether the extracted  $P_{\text{det}}$  truly represents the  
 183 detrital component, as opposed to recrystallised  $P_{\text{auth}}$ , we consider the relationship between  $P_{\text{auth}}$  and  
 184  $P_{\text{det}}$ , which may correlate if  $P_{\text{det}}$  was in large part a product of  $P_{\text{auth}}$  recrystallisation<sup>19</sup>. Although we  
 185 cannot rule out some recrystallization of  $P_{\text{auth}}$  to  $P_{\text{det}}$ , the moderate  $P_{\text{auth}}$  versus  $P_{\text{det}}$  correlation ( $R^2 =$   
 186  $0.22$ ) shown in Supplementary Figure 3b, together with the stronger correlation with detrital element  
 187 Ti ( $R^2 = 0.48$ ) (Supplementary Figure 3c), indicate that the measured  $P_{\text{det}}$  content dominantly reflects  
 188 the actual detrital P input, rather than extensive recrystallization of  $P_{\text{aut}}$ .

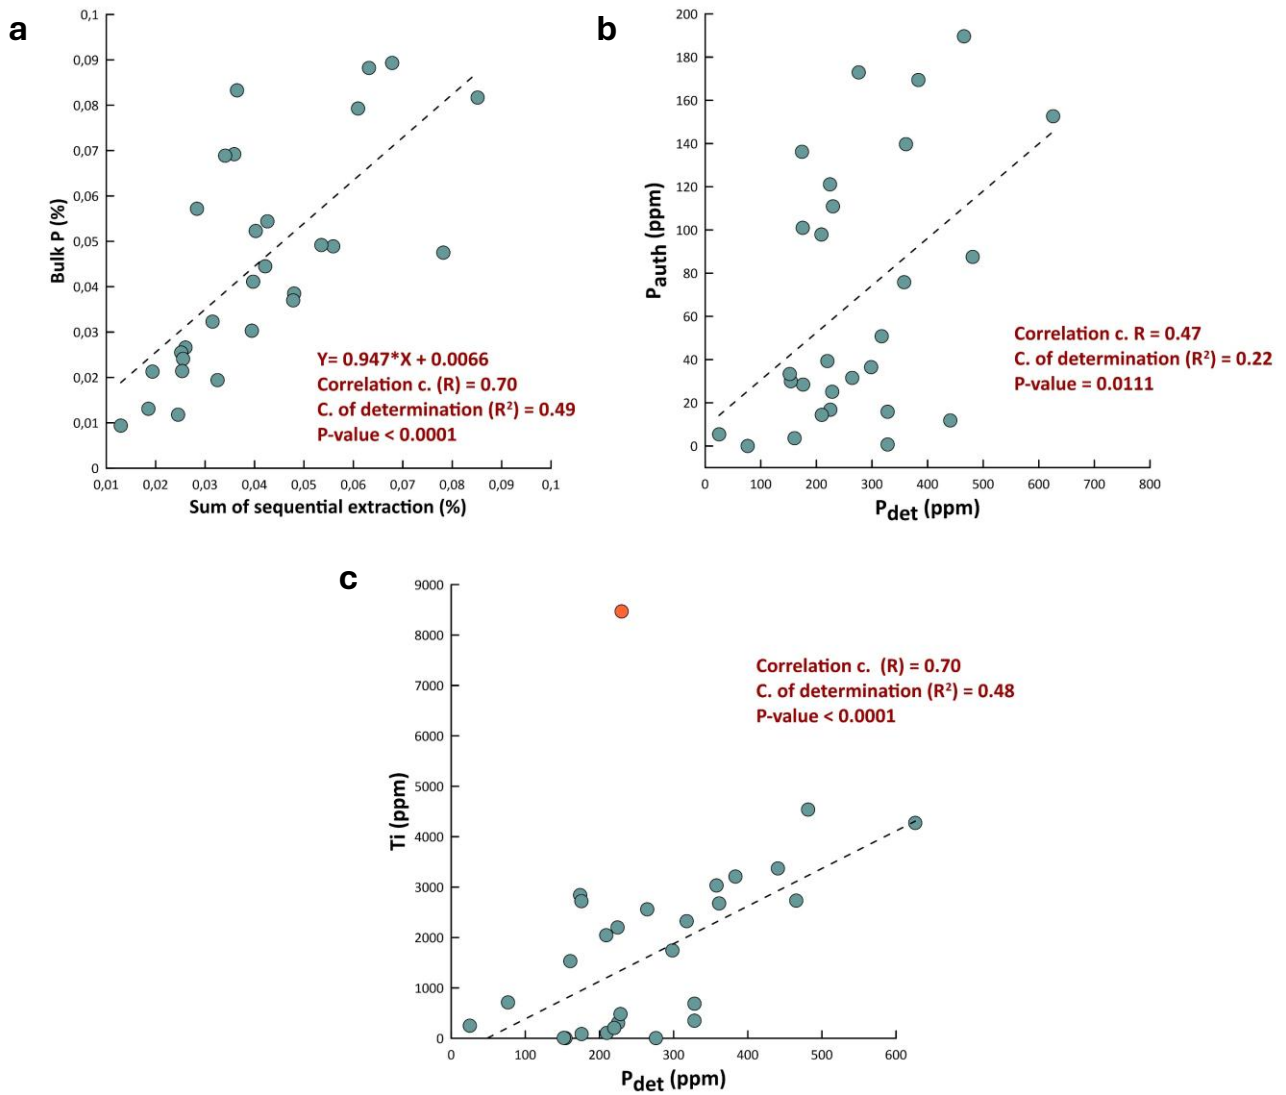

189 **Supplementary Figure 3 Data quality plots and linear regression analysis. a)** Sum of P from  
 190 the sequential extraction vs bulk digestion, showing recovery with the sequential approach. **b)**  
 191 **and c)** P phase partitioning quality checks, showing the lack of correlation between P<sub>auth</sub> and  
 192 P<sub>det</sub> (**b**), compared to the correlations between P<sub>det</sub> and detrital element Ti (**c**), suggesting  
 193 limited recrystallisation of authigenic apatite into well-crystalline, detrital apatite. Note that in  
 194 Supplementary Figure 3c, the sample NGI 20 was discarded for the coefficient calculations  
 195 because of its abnormally high Ti value (~8500 ppm, orange dot).

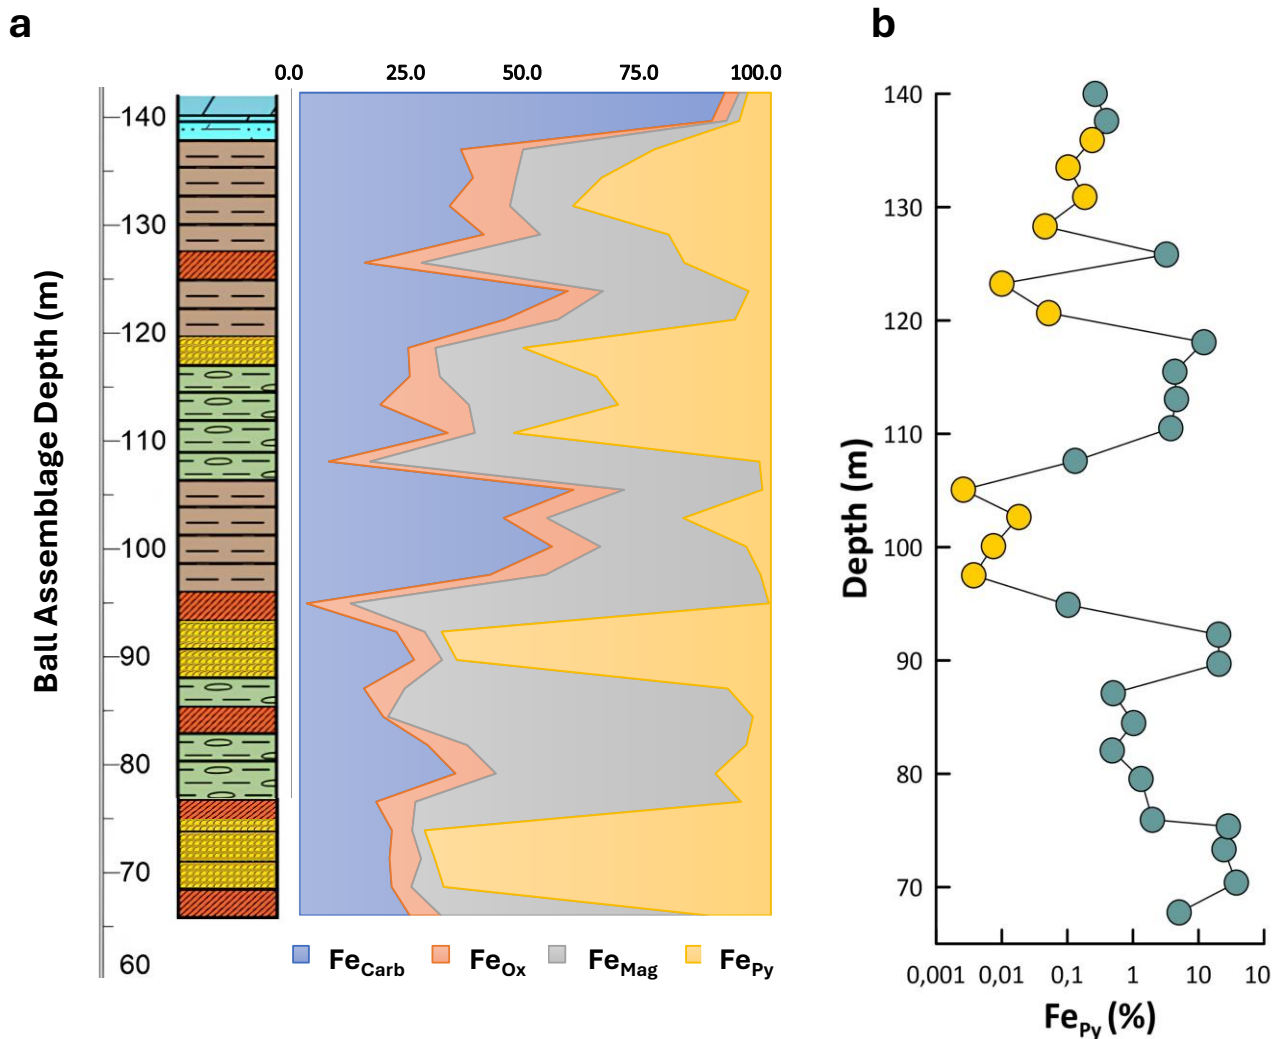

197 **Supplementary Figure 4 NGI10-31 core Fe speciation and Fe<sub>Py</sub> results.** **a)** Iron speciation  
 198 results show the proportion of Fe<sub>Carb</sub>, Fe<sub>Ox</sub>, Fe<sub>Mag</sub> and Fe<sub>Py</sub> within the total Fe pool. **b)** Total Fe<sub>Py</sub>  
 199 content. The yellow circles represent the samples deposited under oxic water-column  
 200 conditions.

## 201 References

- 202 1. Card, K. D. & Ciesielski, A. Subdivisions of the Superior Province of the Canadian Shield.  
 203 *Geosci. Canada* **13** (1986).
- 204 2. Hollings, P. N. Geochemistry in the Uchi subprovince, northern Superior Province, an  
 205 evaluation of the geodynamic evolution of the northern margin of the Superior Province  
 206 ocean basin (1998).
- 207 3. McIntyre, T. & Fralick, P. Sedimentology and Geochemistry of the 2930 Ma Red Lake-Wallace  
 208 Lake Carbonate Platform, Western Superior Province, Canada. *Depos. Rec.* **3**, 258–287 (2017).
- 209 4. Corfu, F. & Wallace, H. U–Pb zircon ages for magmatism in the Red Lake greenstone belt,  
 210 northwestern Ontario. *Can. J. Earth Sci.* **23**, 27–42 (1986).
- 211 5. Afroz, M., Fralick, P. W. & Lalonde, S. V. Sedimentology and geochemistry of basal  
 212 lithofacies in the Mesoarchean (2.93 Ga) Red Lake carbonate platform, northwest Ontario,

- 213 Canada. *Precambrian Res.* **388**, 106996 (2023).
- 214 6. Fralick, P. & Pufahl, P. K. Iron formation in Neoproterozoic deltaic successions and the  
215 microbially mediated deposition of transgressive systems tracts. *J. Sediment. Res.* **76**, 1057–  
216 1066 (2006).
- 217 7. Simonson, B. M. Origin and evolution of large Precambrian iron formations. in *Extreme*  
218 *depositional environments: mega end members in geologic time* (eds. Chan, M. A. & Archer,  
219 A. W.) vol. 370 0 (Geological Society of America, 2003).
- 220 8. Fralick, P. & Riding, R. Steep Rock Lake: Sedimentology and geochemistry of an Archean  
221 carbonate platform. *Earth-Science Rev.* **151**, 132–175 (2015).
- 222 9. Riding, R., Fralick, P. & Liang, L. Identification of an Archean marine oxygen oasis.  
223 *Precambrian Res.* **251**, 232–237 (2014).
- 224 10. Poulton, S. W. & Canfield, D. E. Development of a sequential extraction procedure for iron:  
225 Implications for iron partitioning in continentally derived particulates. *Chem. Geol.* **214**, 209–  
226 221 (2005).
- 227 11. Canfield, D. E., Raiswell, R., Westrich, J. T., Reaves, C. M. & Berner, R. A. The use of chromium  
228 reduction in the analysis of reduced inorganic sulfur in sediments and shales. *Chem. Geol.* **54**,  
229 149–155 (1986).
- 230 12. Raiswell, R. & Canfield, D. E. Sources of iron for pyrite formation in marine sediments. *Am. J.*  
231 *Sci.* **298**, 219–245 (1998).
- 232 13. Ruttenberg, K. C. Development of a sequential extraction method for different forms of  
233 phosphorus in marine sediments. *Limnol. Oceanogr.* **37**, 1460–1482 (1992).
- 234 14. Thompson, J. *et al.* Development of a modified SEDEX phosphorus speciation method for  
235 ancient rocks and modern iron-rich sediments. *Chem. Geol.* **524**, 383–393 (2019).
- 236 15. Strickland, J. D. H. & Parsons, T. R. A Practical Handbook of Seawater Analysis. *Fish. Res.*  
237 *Board Canada, Bull.* **167**, 293 (1972).
- 238 16. Lafargue, E., Marquis, F. & Pillot, D. Rock-Eval 6 applications in hydrocarbon exploration,  
239 production and soil contamination studies. *IFP* **53**, 421–437 (1998).
- 240 17. Kouketsu, Y. *et al.* A new approach to develop the Raman carbonaceous material  
241 geothermometer for low-grade metamorphism using peak width. *Isl. Arc* **23**, 33–50 (2014).
- 242 18. Slomp, C. P., Van Der Gaast, S. J. & Van Raaphorst, W. Phosphorus binding by poorly  
243 crystalline iron oxides in North Sea sediments. *Mar. Chem.* **52**, 55–73 (1996).
- 244 19. Creveling, J. R. *et al.* Phosphorus sources for phosphatic Cambrian carbonates. *Bull. Geol. Soc.*  
245 *Am.* **126**, 145–163 (2014).
- 246
